# Supplementary material
Source: PubMed Central journal article supplement (PMC1950136)
Supplement: NIHMS22662-supplement-Table1.pdf [file NIHMS22662-supplement-Table1.pdf]

**Supplementary Table 1. Differentially expressed genes in different tissues from the SFX mice**

| BONE         |                                       |             | LIVER           |                                       |             | KIDNEY       |                                                             |             |
|--------------|---------------------------------------|-------------|-----------------|---------------------------------------|-------------|--------------|-------------------------------------------------------------|-------------|
| Probe Set ID | Gene Symbol                           | Fold change | Probe Set ID    | Gene Symbol                           | Fold change | Probe Set ID | Gene Symbol                                                 | Fold change |
| 93683_at     | Rag1                                  | 0.03        | 94379_at        | Kif1b                                 | 0.01        | 92898_at     | Cyp7b1                                                      | 0.02        |
| 99339_r_at   | Kcnd2                                 | 0.04        | 94395_at        | Fubp1                                 | 0.02        | 101887_at    | Agt                                                         | 0.03        |
| 101028_i_at  | Actc1                                 | 0.05        | 97965_at        | Pla2g6                                | 0.02        | 92858_at     | Slpi                                                        | 0.03        |
| 92192_s_at   | Pcsk5                                 | 0.08        | 94378_at        | Rgs16                                 | 0.02        | 161968_f_at  | Ccr5                                                        | 0.04        |
| 99507_at     | Ucp1                                  | 0.08        | 94383_at        | Tfpi2                                 | 0.02        | 160799_at    | 160799_at                                                   | 0.04        |
| 92536_at     | Adrb3                                 | 0.11        | 95660_at        | Ethe1                                 | 0.03        | 101020_at    | Ctsc                                                        | 0.05        |
| 100336_s_at  | Bglap-rs1<br>/// Bglap1<br>/// Bglap2 | 0.13        | 94338_g_a<br>t  | Gas2                                  | 0.04        | 104566_at    | Asl                                                         | 0.05        |
| 93957_at     | Vpreb3                                | 0.13        | 92820_at        | Usp2                                  | 0.05        | 101160_at    | Cxcl2                                                       | 0.06        |
| 96766_s_at   | Tyro3                                 | 0.13        | 103646_at       | Crat                                  | 0.05        | 103562_f_at  | 1300007C<br>21Rik ///<br>LOC43376<br>2 ///<br>LOC54608<br>3 | 0.08        |
| 161815_f_at  | Mup1 ///<br>Mup2 ///<br>Mup3          | 0.14        | 100998_at       | H2-Ab1                                | 0.05        | 160975_at    | Rsnl2                                                       | 0.08        |
| 102410_at    | Hs3st1                                | 0.15        | 103955_at       | Cryl1                                 | 0.07        | 102712_at    | Saa3                                                        | 0.08        |
| 160201_r_at  | Slc33a1                               | 0.15        | 160388_at       | Sc4mol                                | 0.08        | 92853_at     | Hspb1                                                       | 0.09        |
| 99428_at     | Igll1                                 | 0.18        | 104072_at       | Apcs                                  | 0.08        | 99420_at     | Igh-V7183                                                   | 0.09        |
| 99637_at     | Col15a1                               | 0.19        | 96783_at        | Mucdhl                                | 0.09        | 102925_at    | Dusp9                                                       | 0.09        |
| 103987_at    | Mog                                   | 0.19        | 100522_s_<br>at | Wbp5                                  | 0.09        | 97335_at     | Timd2                                                       | 0.09        |
| 94900_at     | Sftpc                                 | 0.19        | 103887_at       | S100a9                                | 0.09        | 97533_at     | Fcgrt                                                       | 0.11        |
| 95513_at     | Statip1                               | 0.19        | 104263_at       | Zmym6                                 | 0.10        | 101891_at    | Hsd17b2                                                     | 0.12        |
| 161968_f_at  | Ccr5                                  | 0.20        | 96228_at        | Cyp11a1                               | 0.11        | 162078_at    | Sdh1                                                        | 0.12        |
| 101566_f_at  | Mup1 ///<br>Mup2                      | 0.20        | 100311_f_<br>at | Ear1                                  | 0.12        | 92865_at     | Dnase1                                                      | 0.12        |
| 101910_f_at  | Mup3                                  | 0.20        | 94818_at        | Ogt                                   | 0.12        | 102727_at    | Bdnf                                                        | 0.12        |
| 98960_s_at   | B3galt3                               | 0.22        | 95694_at        | Top1                                  | 0.12        | 100329_at    | Serpina1c                                                   | 0.14        |
| 101878_at    | Cd72                                  | 0.22        | 104584_f_<br>at | Crb3                                  | 0.13        | 104388_at    | Ccl9                                                        | 0.15        |
| 95974_at     | Gbp1                                  | 0.22        | 97682_r_a<br>t  | Gstm3                                 | 0.13        | 96867_at     | Azgp1                                                       | 0.17        |
| 92379_f_at   | Ptprz1                                | 0.22        | 99642_i_at      | Cpe                                   | 0.14        | 99836_at     | Cyp27b1                                                     | 0.17        |
| 103401_at    | Acads                                 | 0.23        | 160417_at       | Kif5b                                 | 0.14        | 101872_at    | Gsta2                                                       | 0.18        |
| 92227_s_at   | Ctnna2                                | 0.23        | 160306_at       | Thrsp                                 | 0.15        | 92849_at     | Ccl6                                                        | 0.18        |
| 160841_at    | Dbp                                   | 0.23        | 100468_g_<br>at | Lyl1                                  | 0.16        | 97752_at     | E130013N<br>09Rik                                           | 0.20        |
| 98989_at     | Dhcr7                                 | 0.23        | 103914_at       | Pcyt2                                 | 0.16        | 96020_at     | C1qb                                                        | 0.20        |
| 103665_at    | Elovl6                                | 0.23        | 92531_at        | Tloc1                                 | 0.18        | 93096_at     | Fgg                                                         | 0.21        |
| 93321_at     | Ifi203                                | 0.23        | 100368_at       | Casp9                                 | 0.19        | 92315_at     | Sifn4                                                       | 0.21        |
| 102405_at    | Mag                                   | 0.23        | 96803_at        | Gbe1                                  | 0.19        | 103882_at    | Cpn1                                                        | 0.21        |
| 93350_f_at   | Zfp422                                | 0.23        | 96048_at        | Hrsp12                                | 0.19        | 104263_at    | Zmym6                                                       | 0.22        |
| 160236_at    | 9630044O<br>09Rik                     | 0.25        | 94764_at        | Itgal                                 | 0.19        | 94426_at     | Thumpd1                                                     | 0.22        |
| 103838_at    | Sypl2                                 | 0.25        | 93869_s_a<br>t  | Bcl2a1a ///<br>Bcl2a1c ///<br>Bcl2a1d | 0.20        | 97480_f_at   | Dnajb3                                                      | 0.22        |
| 101503_at    | Dpysl3                                | 0.27        | 95471_at        | Cdkn1c                                | 0.22        | 102748_at    | 102748_at                                                   | 0.22        |
| 94205_at     | Epx                                   | 0.27        | 103891_i_<br>at | Eli2                                  | 0.22        | 95348_at     | Cxcl1                                                       | 0.23        |
| 101408_at    | Gamt                                  | 0.27        | 92222_f_at      | H2-Q1                                 | 0.22        | 94477_at     | LOC43449<br>8                                               | 0.23        |
| 103787_at    | Kcna1                                 | 0.27        | 102796_at       | Npm3                                  | 0.22        | 102192_r_at  | Acsm3                                                       | 0.23        |
| 93387_at     | Kera                                  | 0.27        | 102233_at       | 4833442J19Rik                         | 0.23        | 104258_at    | Acyp2                                                       | 0.23        |
| 103223_at    | Prkce                                 | 0.27        | 104424_at       | C9                                    | 0.23        | 101027_s_at  | Pttg1                                                       | 0.24        |

|             |                           |      |             |                                |      |             |                                                                             |      |
|-------------|---------------------------|------|-------------|--------------------------------|------|-------------|-----------------------------------------------------------------------------|------|
| 97235_f_at  | Apobec2                   | 0.29 | 98507_at    | Nr1d1                          | 0.23 | 94163_at    | Atp4a                                                                       | 0.24 |
| 103422_at   | Cd1d1                     | 0.29 | 99032_at    | Rasd1                          | 0.23 | 160561_at   | Mdk                                                                         | 0.24 |
| 102749_at   | Cox7a1                    | 0.29 | 102783_at   | 2310009E04Rik<br>/// LOC435793 | 0.25 | 93985_at    | Tiparp                                                                      | 0.24 |
| 103961_s_at | Dntt                      | 0.29 | 95725_at    | Acy3                           | 0.25 | 96792_at    | Apob                                                                        | 0.25 |
| 102373_at   | Enpep                     | 0.29 | 95001_at    | Akap8                          | 0.25 | 100583_at   | Igh-VJ558<br>///<br>LOC23844<br>7 ///<br>LOC54490<br>3 ///<br>LOC54490<br>7 | 0.26 |
| 99571_at    | MGC29978                  | 0.29 | 96083_s_at  | Hnrpdl                         | 0.25 | 160901_at   | Fos                                                                         | 0.26 |
| 100929_at   | Mtmr9                     | 0.29 | 97926_s_at  | Pparg                          | 0.25 | 101572_f_at | Serpina1a                                                                   | 0.26 |
| 100017_at   | Mybph                     | 0.29 | 160725_at   | 4930432O21Rik                  | 0.27 | 160074_at   | Ddc                                                                         | 0.27 |
| 97341_at    | Praf2                     | 0.29 | 95348_at    | Cxcl1                          | 0.27 | 101173_at   | Pctp                                                                        | 0.27 |
| 103744_at   | Sh3bgrl2                  | 0.29 | 92509_at    | F12                            | 0.27 | 104726_at   | 1700013L2<br>3Rik                                                           | 0.27 |
| 101539_f_at | Ces3                      | 0.31 | 104231_at   | Hnrph3                         | 0.27 | 100972_s_at | Ccl27                                                                       | 0.27 |
| 98967_at    | Fabp7                     | 0.31 | 92202_g_at  | Zbtb16                         | 0.27 | 95585_at    | Proc                                                                        | 0.27 |
| 98575_at    | Fasn                      | 0.31 | 100880_at   | 9830147J24Rik                  | 0.29 | 96796_f_at  | Ugt2b5                                                                      | 0.28 |
| 92737_at    | Irf4                      | 0.31 | 103875_at   | Ngrn                           | 0.29 | 100880_at   | 9830147J2<br>4Rik                                                           | 0.28 |
| 103231_at   | Rhoh                      | 0.31 | 102791_at   | Psmb8                          | 0.29 | 100050_at   | Id1                                                                         | 0.29 |
| 104564_at   | Scg3                      | 0.31 | 101043_f_at | Try4 ///<br>1810049H19Rik      | 0.29 | 92590_at    | Hmgcs2                                                                      | 0.29 |
| 98339_at    | Syt11                     | 0.31 | 93924_f_at  | Tuba7                          | 0.29 | 95350_at    | Ttr                                                                         | 0.29 |
| 98872_at    | Ugt8a                     | 0.31 | 96156_at    | 1110008H02Rik                  | 0.31 | 104374_at   | Serpina3n                                                                   | 0.30 |
| 93430_at    | Cmkor1                    | 0.33 | 102870_at   | 5930418K15Rik                  | 0.31 | 160564_at   | Lcn2                                                                        | 0.30 |
| 160522_at   | D0H4S114                  | 0.33 | 94232_at    | Ccnd1                          | 0.31 | 104405_at   | 4633402D<br>15Rik                                                           | 0.30 |
| 93775_at    | D12Erttd64<br>7e          | 0.33 | 98543_at    | Ctss                           | 0.31 | 161284_r_at | Txnrd3                                                                      | 0.30 |
| 97317_at    | Enpp2                     | 0.33 | 101862_at   | Cyp2b9                         | 0.31 | 94274_at    | Ube2s                                                                       | 0.30 |
| 94214_at    | Fabp3                     | 0.33 | 93783_at    | Eia1                           | 0.31 | 92614_at    | Id3                                                                         | 0.31 |
| 101090_at   | Fbn1                      | 0.33 | 101894_s_at | Fts                            | 0.31 | 100078_at   | Apoa4                                                                       | 0.31 |
| 103061_at   | Gad1                      | 0.33 | 102313_at   | Gch1                           | 0.31 | 100943_at   | Slc1a4                                                                      | 0.32 |
| 93584_at    | Igh-6 ///<br>MGC6084<br>3 | 0.33 | 96269_at    | Idi1                           | 0.31 | 161722_f_at | Gstm5                                                                       | 0.32 |
| 94334_f_at  | Ina                       | 0.33 | 99926_at    | Ubtf                           | 0.31 | 104398_at   | Tspan33                                                                     | 0.32 |
| 93039_at    | MGI:18892<br>05           | 0.33 | 160493_at   | Cd63                           | 0.33 | 94288_at    | Hist1h1c                                                                    | 0.32 |
| 100759_at   | Mrc2                      | 0.33 | 95392_at    | Gcnt2                          | 0.33 | 100141_at   | Fau                                                                         | 0.32 |
| 94958_at    | 1110013L0<br>7Rik         | 0.35 | 96938_at    | Keg1                           | 0.33 | 93039_at    | MGI:18892<br>05                                                             | 0.32 |
| 95375_r_at  | Cilp2                     | 0.35 | 99855_at    | Map3k5                         | 0.33 | 96026_at    | Ahcy                                                                        | 0.33 |
| 92836_at    | Eln                       | 0.35 | 101486_at   | Psmb10                         | 0.33 | 98035_g_at  | H2-DMb1                                                                     | 0.33 |
| 103590_at   | Ggcx                      | 0.35 | 103448_at   | S100a8                         | 0.33 | 160605_s_at | Usp38                                                                       | 0.33 |
| 160917_r_at | Mageh1                    | 0.35 | 92583_at    | Serpina3k                      | 0.33 | 103918_at   | Slc15a2                                                                     | 0.33 |
| 102828_at   | Map2k6                    | 0.35 | 104637_at   | 104637_at                      | 0.35 | 100397_at   | Tyrobp                                                                      | 0.33 |
| 102431_at   | Mapt                      | 0.35 | 161511_f_at | 161511_f_at                    | 0.35 | 96868_at    | Fgb                                                                         | 0.33 |
| 98547_at    | Mrps12                    | 0.35 | 100321_f_at | 2210418O10Rik                  | 0.35 | 104606_at   | Cd52                                                                        | 0.34 |
| 160487_at   | Myl4                      | 0.35 | 100300_at   | Cybb                           | 0.35 | 95283_at    | Abcc2                                                                       | 0.34 |
| 160481_at   | Pck1                      | 0.35 | 94177_at    | Hsd17b7                        | 0.35 | 101307_at   | Cyp4a12                                                                     | 0.34 |
| 96313_at    | Rasgrf1                   | 0.35 | 104658_at   | Lifr                           | 0.35 | 93740_at    | Ybx1                                                                        | 0.34 |

|             |                                                                                                                                                            |      |             |                        |      |             |               |      |
|-------------|------------------------------------------------------------------------------------------------------------------------------------------------------------|------|-------------|------------------------|------|-------------|---------------|------|
| 96205_at    | Sh3bgr                                                                                                                                                     | 0.35 | 101082_at   | Mod1                   | 0.35 | 98859_at    | Acp5          | 0.34 |
| 100455_at   | Snap91                                                                                                                                                     | 0.35 | 103471_at   | Tbc1d15                | 0.35 | 96068_at    | Immp1l        | 0.35 |
| 161055_r_at | 6330409N04Rik                                                                                                                                              | 0.38 | 98129_at    | Tmsb10                 | 0.35 | 103693_at   | Tirap         | 0.35 |
| 103556_at   | Angptl2                                                                                                                                                    | 0.38 | 161270_i_at | Wnk1                   | 0.35 | 94318_at    | ApoH          | 0.36 |
| 102704_at   | Aqp4                                                                                                                                                       | 0.38 | 101578_f_at | Actb                   | 0.38 | 93114_at    | Atp5j2        | 0.36 |
| 103281_at   | Cd2ap                                                                                                                                                      | 0.38 | 102781_at   | Ccnl2                  | 0.38 | 103671_at   | Htatip2       | 0.36 |
| 99994_at    | Cidea                                                                                                                                                      | 0.38 | 99672_at    | Cicn4-2                | 0.38 | 161901_r_at | Bmp2          | 0.36 |
| 93517_at    | Col6a2                                                                                                                                                     | 0.38 | 101020_at   | Ctsc                   | 0.38 | 93889_f_at  | Hist1h2ba     | 0.37 |
| 101110_at   | Col6a3                                                                                                                                                     | 0.38 | 96375_at    | D9ErtD306e             | 0.38 | 94916_at    | Cyp51         | 0.37 |
| 160711_at   | Decr1                                                                                                                                                      | 0.38 | 103597_at   | Dct                    | 0.38 | 94203_at    | A630025C20Rik | 0.37 |
| 101587_at   | Ephx1                                                                                                                                                      | 0.38 | 103842_at   | Ddx3y                  | 0.38 | 97420_at    | Lrg1          | 0.37 |
| 98822_at    | G1p2                                                                                                                                                       | 0.38 | 98531_g_at  | Gas5                   | 0.38 | 98589_at    | Adfp          | 0.37 |
| 99816_at    | Hspa2                                                                                                                                                      | 0.38 | 98002_at    | Irf8                   | 0.38 | 93589_at    | Entpd4        | 0.37 |
| 93511_at    | Itn2a                                                                                                                                                      | 0.38 | 100611_at   | Lyzs                   | 0.38 | 161835_at   | S100g         | 0.37 |
| 97347_at    | Ltbp4                                                                                                                                                      | 0.38 | 161815_f_at | Mup1 /// Mup2 /// Mup3 | 0.38 | 99071_at    | Mpeg1         | 0.37 |
| 96065_at    | Lxn                                                                                                                                                        | 0.38 | 101473_at   | Nnmt                   | 0.38 | 97531_at    | G0s2          | 0.37 |
| 97511_at    | Mgll                                                                                                                                                       | 0.38 | 103944_at   | Rad51l1                | 0.38 | 95636_at    | 0610010K14Rik | 0.38 |
| 101635_f_at | Mup5                                                                                                                                                       | 0.38 | 94147_at    | Serpine1               | 0.38 | 94995_at    | A030007L17Rik | 0.38 |
| 160413_at   | Nsg2                                                                                                                                                       | 0.38 | 92540_f_at  | Srm /// LOC547378      | 0.38 | 95586_at    | P2rx4         | 0.38 |
| 97834_g_at  | Pfcp                                                                                                                                                       | 0.38 | 102873_at   | Tap2                   | 0.38 | 100977_at   | Pdk1          | 0.39 |
| 92599_at    | Pgam2                                                                                                                                                      | 0.38 | 92374_at    | Adora1                 | 0.41 | 94285_at    | H2-Eb1        | 0.39 |
| 101881_g_at | Col18a1                                                                                                                                                    | 0.41 | 98055_at    | Bicap                  | 0.41 | 104177_at   | Rsad2         | 0.39 |
| 94916_at    | Cyp51                                                                                                                                                      | 0.41 | 93458_at    | C330003B14Rik          | 0.41 | 99608_at    | Prdx2         | 0.39 |
| 95284_at    | Fcrlm1                                                                                                                                                     | 0.41 | 97949_at    | Fgl2                   | 0.41 | 160343_at   | Srp19         | 0.40 |
| 94194_s_at  | Hcn2                                                                                                                                                       | 0.41 | 104750_at   | Ifi47                  | 0.41 | 97950_at    | Xdh           | 0.40 |
| 94325_at    | Hmgcs1                                                                                                                                                     | 0.41 | 160933_at   | Igtp                   | 0.41 | 95686_at    | Rab14         | 0.40 |
| 103214_at   | Hspb2                                                                                                                                                      | 0.41 | 103963_f_at | ligp1                  | 0.41 | 99656_at    | D8ErtD812e    | 0.40 |
| 101682_f_at | Mup4                                                                                                                                                       | 0.41 | 160617_at   | Klf13                  | 0.41 | 95569_at    | Guca2b        | 0.41 |
| 101059_at   | Ndn                                                                                                                                                        | 0.41 | 160829_at   | Phlda1                 | 0.41 | 100475_at   | Trim25        | 0.41 |
| 101650_at   | Pcdha4 /// Pcdha6 /// Pcdha7 /// Pcdha5 /// Pcdha11 /// Pcdha10 /// Pcdha1 /// Pcdha9 /// Pcdha3 /// Pcdha12 /// Pcdha2 /// Pcdha8 /// Pcdhac1 /// Pcdhac2 | 0.41 | 97395_at    | Prp19                  | 0.41 | 104172_at   | Folr2         | 0.41 |
| 95040_at    | Pdcd6ip                                                                                                                                                    | 0.41 | 93485_at    | Ptprd                  | 0.41 | 96502_at    | Phex          | 0.41 |
| 102769_f_at | Sc5d                                                                                                                                                       | 0.41 | 94780_at    | Zbtb20                 | 0.41 | 97418_at    | Bhmt2         | 0.42 |
| 92981_at    | Scg2                                                                                                                                                       | 0.41 | 101959_r_at | 101959_r_at            | 0.44 | 93434_at    | Sult5a1       | 0.42 |
| 161297_f_at | Vpreb1                                                                                                                                                     | 0.41 | 104513_at   | 2410004N09Rik          | 0.44 | 103085_at   | Hebp1         | 0.42 |
| 103499_at   | Vwf                                                                                                                                                        | 0.41 | 104475_at   | AA408278               | 0.44 | 160088_at   | Fmo5          | 0.42 |
| 161270_i_at | Wnk1                                                                                                                                                       | 0.41 | 99671_at    | Adn                    | 0.44 | 98569_at    | Slc25a25      | 0.42 |
| 104445_at   | 4631408O                                                                                                                                                   | 0.44 | 101947_at   | Akap8l                 | 0.44 | 161437_f_at | 6530401N      | 0.43 |

|             |               |      |             |                |      |             |                                  |      |
|-------------|---------------|------|-------------|----------------|------|-------------|----------------------------------|------|
|             | 11Rik         |      |             |                |      |             | 04Rik                            |      |
| 96090_g_at  | 4931406C07Rik | 0.44 | 102826_at   | Akr1b7         | 0.44 | 93145_at    | Gatad2a                          | 0.43 |
| 92526_f_at  | Btbd14a       | 0.44 | 101913_at   | Cln5           | 0.44 | 94709_at    | Gcm2                             | 0.43 |
| 93454_at    | C1qr1         | 0.44 | 100059_at   | Cyba           | 0.44 | 103732_at   | Pib5pa                           | 0.43 |
| 102426_at   | Casq1         | 0.44 | 99941_at    | Es31           | 0.44 | 104631_g_at | BC021611                         | 0.44 |
| 162297_s_at | Cav3          | 0.44 | 94125_at    | Eva1           | 0.44 | 96151_at    | Mocos                            | 0.44 |
| 93174_at    | Cd276         | 0.44 | 97889_at    | Fabp2          | 0.44 | 103644_at   | Dpep1                            | 0.44 |
| 100044_at   | Cldn11        | 0.44 | 94325_at    | Hmgcs1         | 0.44 | 161294_f_at | Clu                              | 0.44 |
| 103616_at   | Col11a2       | 0.44 | 92724_at    | Hnrpa1         | 0.44 | 104086_at   | Dmgdh                            | 0.45 |
| 102389_s_at | Gap43         | 0.44 | 103370_at   | Lin7c          | 0.44 | 99842_at    | Col19a1                          | 0.45 |
| 103202_at   | Gbp4          | 0.44 | 94461_at    | Pbef1          | 0.44 | 93372_at    | Anp32a                           | 0.45 |
| 98984_f_at  | Gpd2          | 0.44 | 94209_g_at  | Pdia6          | 0.44 | 98562_at    | C1qa                             | 0.45 |
| 92506_at    | Hapln1        | 0.44 | 102053_at   | Plscr2         | 0.44 | 92970_at    | Hoxa10                           | 0.45 |
| 100566_at   | Igfbp5        | 0.44 | 98511_at    | Raly           | 0.44 | 162432_f_at | Mogat2                           | 0.45 |
| 93353_at    | Lum           | 0.44 | 101465_at   | Stat1          | 0.44 | 94006_at    | Azi2                             | 0.46 |
| 104567_at   | Mrpl46        | 0.44 | 102906_at   | Tgtp           | 0.44 | 102852_at   | Cdh2                             | 0.46 |
| 92801_at    | Plp1          | 0.44 | 97473_at    | Tspan4         | 0.44 | 99378_f_at  | H2-Q1 /// LOC436493              | 0.46 |
| 93915_at    | Pou2af1       | 0.44 | 99126_at    | Xist           | 0.44 | 97216_at    | Pzp                              | 0.46 |
| 96591_at    | Reln          | 0.44 | 93661_at    | Zap70          | 0.44 | 100912_at   | Dph5                             | 0.46 |
| 94545_at    | Rtn1          | 0.44 | 102724_at   | 102724_at      | 0.47 | 102104_f_at | Ms4a6c                           | 0.47 |
| 101467_at   | S100b         | 0.44 | 103443_at   | 103443_at      | 0.47 | 101384_at   | Degs2                            | 0.47 |
| 94291_at    | Scgb1a1       | 0.44 | 160119_at   | 5730592L21Rik  | 0.47 | 161839_f_at | Rasl2-9                          | 0.47 |
| 160869_at   | Sirt3         | 0.44 | 97524_f_at  | Amy2           | 0.47 | 104014_at   | Hfe                              | 0.47 |
| 101420_at   | Slc32a1       | 0.44 | 100078_at   | Apoa4          | 0.47 | 95364_at    | Gna14                            | 0.47 |
| 93159_at    | Syt2          | 0.44 | 93797_g_at  | Atp1a1         | 0.47 | 94322_at    | Sqle                             | 0.47 |
| 102906_at   | Tgtp          | 0.44 | 92408_at    | C130065N10Rik  | 0.47 | 94380_at    | Ide                              | 0.47 |
| 99057_at    | Thy1          | 0.44 | 93445_at    | Cd5l           | 0.47 | 161997_f_at | 161997_f_at                      | 0.48 |
| 160472_r_at | Tmeff1        | 0.44 | 98539_at    | Cops2          | 0.47 | 94424_at    | AU022220                         | 0.48 |
| 98474_r_at  | Tnfaip6       | 0.44 | 103518_at   | Ctla2b         | 0.47 | 160407_at   | Actr1a                           | 0.48 |
| 104045_at   | Tspyl4        | 0.44 | 103460_at   | Ddit4          | 0.47 | 93606_s_at  | Igsf4a                           | 0.48 |
| 101419_at   | Tubb4         | 0.44 | 100914_at   | Drd3           | 0.47 | 103016_s_at | Cd68                             | 0.48 |
| 92971_at    | 9130213B05Rik | 0.47 | 98575_at    | Fasn           | 0.47 | 95095_at    | Flot1                            | 0.48 |
| 161467_f_at | Atp1b1        | 0.47 | 99098_at    | Fdps           | 0.47 | 161357_r_at | Gstm2                            | 0.48 |
| 93664_at    | Atp1b2        | 0.47 | 104597_at   | Gbp2           | 0.47 | 162198_f_at | 162198_f_at                      | 0.49 |
| 92742_at    | Ccl11         | 0.47 | 103202_at   | Gbp4           | 0.47 | 160839_at   | Slc2a5                           | 0.49 |
| 97773_at    | Cd34          | 0.47 | 104636_at   | Gstm6          | 0.47 | 92830_s_at  | Zfp36                            | 0.49 |
| 104733_at   | Cetn2         | 0.47 | 103939_at   | Hibch          | 0.47 | 161367_f_at | Hps1                             | 0.50 |
| 101198_at   | Cplx1         | 0.47 | 97987_at    | Igfals         | 0.47 | 101878_at   | Cd72                             | 0.50 |
| 93051_at    | Ephx2         | 0.47 | 96123_at    | Lbp            | 0.47 | 102851_s_at | Ptpn6                            | 0.50 |
| 96913_at    | Hadhb         | 0.47 | 95706_at    | Lgals3         | 0.47 | 101445_at   | Dnmt1                            | 2.0  |
| 95485_at    | Hadhsc        | 0.47 | 93753_at    | Litaf          | 0.47 | 160582_at   | Mybpc3                           | 2.0  |
| 96095_i_at  | Hsd12         | 0.47 | 96041_at    | LOC433432      | 0.47 | 92896_s_at  | Sim2 /// LOC547289 /// LOC547335 | 2.0  |
| 96594_at    | Hspa4         | 0.47 | 101753_s_at | Lyzs /// Lzp-s | 0.47 | 96772_at    | Prim1                            | 2.0  |
| 99937_at    | Meox2         | 0.47 | 101468_at   | Pfc            | 0.47 | 101034_at   | Grb2                             | 2.0  |
| 102061_at   | Mlf1          | 0.47 | 101923_at   | Pla2g7         | 0.47 | 102995_s_at | Gzma                             | 2.0  |
| 101082_at   | Mod1          | 0.47 | 101027_s_at | Pttg1          | 0.47 | 92484_at    | Hivep2                           | 2.0  |
| 94509_at    | Ncbp2         | 0.47 | 92659_at    | Rapgef4        | 0.47 | 102715_at   | Nr2f1                            | 2.0  |

|             |                     |      |             |                                                    |      |             |                    |     |
|-------------|---------------------|------|-------------|----------------------------------------------------|------|-------------|--------------------|-----|
| 93563_s_at  | Nid2                | 0.47 | 92770_at    | S100a6                                             | 0.47 | 103032_at   | Tpst1              | 2.0 |
| 160388_at   | Sc4mol              | 0.47 | 93502_r_at  | Sucla2                                             | 0.47 | 98454_at    | Palm               | 2.0 |
| 94057_g_at  | Scd1                | 0.47 | 99854_at    | Sult3a1                                            | 0.47 | 160456_at   | Ppih               | 2.0 |
| 94201_at    | Scn1a               | 0.47 | 94426_at    | Thumpd1                                            | 0.47 | 104475_at   | AA408278           | 2.0 |
| 160373_i_at | Sdpr                | 0.47 | 160462_f_at | Tubb3                                              | 0.47 | 103212_at   | Cdca7l             | 2.0 |
| 161104_at   | Sept10              | 0.47 | 92715_at    | Ubd                                                | 0.47 | 93664_at    | Atp1b2             | 2.0 |
| 97430_at    | Slc37a4             | 0.47 | 92558_at    | Vcam1                                              | 0.47 | 96354_at    | Mbnl1              | 2.1 |
| 100047_at   | Snap25              | 0.47 | 104445_at   | 4631408O11Rik                                      | 0.50 | 102794_at   | Cxcr4              | 2.1 |
| 97983_s_at  | Stxbp1              | 0.47 | 95028_r_at  | 95028_r_at                                         | 0.50 | 100044_at   | Cldn11             | 2.1 |
| 160678_at   | Tspan12             | 0.47 | 101006_at   | Acat2                                              | 0.50 | 96158_at    | BC017133           | 2.1 |
| 92892_at    | Vmp                 | 0.47 | 101897_g_at | Cd1d1 /// Cd1d2                                    | 0.50 | 100772_g_at | Blnk               | 2.1 |
| 104299_at   | Zdhhc14             | 0.47 | 160894_at   | Cebpd                                              | 0.50 | 97413_at    | 1600029D21Rik      | 2.1 |
| 96124_at    | 2310001H13Rik       | 0.50 | 101436_at   | Cxcl9                                              | 0.50 | 94140_at    | Msr1               | 2.1 |
| 100902_at   | 2610019F03Rik       | 0.50 | 98320_at    | Cyp26a1                                            | 0.50 | 97864_at    | 2510049I19Rik      | 2.1 |
| 160166_r_at | 2810409H07Rik       | 0.50 | 94916_at    | Cyp51                                              | 0.50 | 97536_at    | Wdtdc1             | 2.1 |
| 94778_at    | Aldh1a7             | 0.50 | 161345_f_at | Cyp7b1                                             | 0.50 | 100307_at   | Nfix               | 2.1 |
| 100931_at   | Arsa                | 0.50 | 99422_at    | Fau                                                | 0.50 | 104387_at   | Slc23a1            | 2.1 |
| 92359_at    | Blk                 | 0.50 | 101800_at   | Fpr-rs2                                            | 0.50 | 99444_at    | Ramp2              | 2.1 |
| 100772_g_at | Blnk                | 0.50 | 97458_at    | Gnb1                                               | 0.50 | 102721_at   | AI324046           | 2.1 |
| 92989_f_at  | Cadps               | 0.50 | 92866_at    | H2-Aa                                              | 0.50 | 92468_at    | Ankrd49            | 2.1 |
| 101040_at   | Capn2               | 0.50 | 103534_at   | Hbb-b2                                             | 0.50 | 103233_at   | Hipk3              | 2.1 |
| 103618_at   | Ckmt2               | 0.50 | 93483_at    | Hck                                                | 0.50 | 102152_f_at | Igh-VS107          | 2.1 |
| 92936_at    | Cntn1               | 0.50 | 93833_s_at  | Hist1h2bc                                          | 0.50 | 161920_r_at | Smarcad1           | 2.1 |
| 98331_at    | Col3a1              | 0.50 | 92689_at    | Il18bp                                             | 0.50 | 103927_at   | C80731             | 2.1 |
| 97204_s_at  | Dnajc15             | 0.50 | 160564_at   | Lcn2                                               | 0.50 | 104211_at   | Itga3              | 2.1 |
| 99045_at    | Eno2                | 0.50 | 160832_at   | Ldlr                                               | 0.50 | 102331_at   | St5                | 2.1 |
| 92927_at    | Etv1                | 0.50 | 101566_f_at | Mup1 /// Mup2                                      | 0.50 | 96802_at    | Pdcd7              | 2.1 |
| 102967_at   | Gdap1               | 0.50 | 101909_f_at | Mup3                                               | 0.50 | 95284_at    | Fcrlm1             | 2.1 |
| 104412_at   | Gnai1               | 0.50 | 101635_f_at | Mup5                                               | 0.50 | 104186_at   | Rnf184             | 2.1 |
| 101620_at   | Gp1ba               | 0.50 | 100977_at   | Pdk1                                               | 0.50 | 94829_at    | Tmem70             | 2.1 |
| 94811_s_at  | Gtf2h1 /// Ndn      | 0.50 | 102649_s_at | Raet1a /// Raet1b /// Raet1c /// Raet1d /// Raet1e | 0.50 | 103438_at   | Dio2               | 2.1 |
| 160199_at   | Hnrpc /// LOC329893 | 0.50 | 96056_at    | Rhoc                                               | 0.50 | 161060_i_at | Ddx51              | 2.1 |
| 101441_i_at | Itpr2               | 0.50 | 100333_at   | Saa2                                               | 0.50 | 161119_at   | Epha5              | 2.1 |
| 160971_at   | Kazald1             | 0.50 | 92213_at    | Star                                               | 0.50 | 160272_at   | 160272_at          | 2.2 |
| 93565_at    | Kns2                | 0.50 | 103957_at   | Tfrc                                               | 0.50 | 101774_at   | Col4a4             | 2.2 |
| 100421_at   | Krt2-4              | 0.50 | 97253_at    | Tpd52l2                                            | 0.50 | 94024_at    | Ris2               | 2.2 |
| 104658_at   | Lifr                | 0.50 | 94835_f_at  | Tubb2                                              | 0.50 | 102001_at   | Rrm2               | 2.2 |
| 102037_at   | Mapre2              | 0.50 | 96215_f_at  | 96215_f_at                                         | 2.0  | 101130_at   | Col1a2             | 2.2 |
| 96865_at    | Marcks              | 0.50 | 102200_at   | Aqp8                                               | 2.0  | 161000_i_at | Nusap1             | 2.2 |
| 97990_at    | Myh11               | 0.50 | 94689_at    | C79248                                             | 2.0  | 160424_f_at | Fdps /// LOC544723 | 2.2 |
| 93514_at    | Myl3                | 0.50 | 101039_at   | Col4a2                                             | 2.0  | 101426_at   | Cerk               | 2.2 |
| 102819_at   | Nap1l2              | 0.50 | 102847_s_at | Cyp2a4 ///                                         | 2.0  | 103459_at   | Slc39a6            | 2.2 |

|             |                            |      |             |                                                                                                                                                                                                                                                                                                                                                                                                                                                                        |     |             |                   |     |
|-------------|----------------------------|------|-------------|------------------------------------------------------------------------------------------------------------------------------------------------------------------------------------------------------------------------------------------------------------------------------------------------------------------------------------------------------------------------------------------------------------------------------------------------------------------------|-----|-------------|-------------------|-----|
|             |                            |      | at          | Cyp2a5                                                                                                                                                                                                                                                                                                                                                                                                                                                                 |     |             |                   |     |
| 99633_at    | Ncdn                       | 0.50 | 99463_at    | Cyp3a13                                                                                                                                                                                                                                                                                                                                                                                                                                                                | 2.0 | 96961_at    | Rnf110            | 2.2 |
| 160859_s_at | Nfib                       | 0.50 | 98572_at    | Dnajb11                                                                                                                                                                                                                                                                                                                                                                                                                                                                | 2.0 | 101442_f_at | Itpr2             | 2.2 |
| 92773_at    | Nrp1                       | 0.50 | 103665_at   | Elovl6                                                                                                                                                                                                                                                                                                                                                                                                                                                                 | 2.0 | 94820_r_at  | Ccni              | 2.2 |
| 95890_r_at  | Pax5                       | 0.50 | 103507_at   | Emr1                                                                                                                                                                                                                                                                                                                                                                                                                                                                   | 2.0 | 99453_at    | Pde1a             | 2.2 |
| 93349_at    | Pcolce                     | 0.50 | 102921_s_at | Fas                                                                                                                                                                                                                                                                                                                                                                                                                                                                    | 2.0 | 101458_at   | Wee1              | 2.2 |
| 101042_f_at | Pep4                       | 0.50 | 96336_at    | Gatm                                                                                                                                                                                                                                                                                                                                                                                                                                                                   | 2.0 | 100489_at   | Pde7a             | 2.2 |
| 97445_at    | Ppid                       | 0.50 | 101054_at   | li                                                                                                                                                                                                                                                                                                                                                                                                                                                                     | 2.0 | 97415_at    | Rab3d             | 2.2 |
| 95300_at    | Prg3                       | 0.50 | 92301_at    | lkbke                                                                                                                                                                                                                                                                                                                                                                                                                                                                  | 2.0 | 100472_at   | Enah              | 2.2 |
| 94238_at    | Prss23                     | 0.50 | 97409_at    | Irgm                                                                                                                                                                                                                                                                                                                                                                                                                                                                   | 2.0 | 101451_at   | Peg3              | 2.2 |
| 100505_at   | Rit2                       | 0.50 | 99602_at    | Klf10                                                                                                                                                                                                                                                                                                                                                                                                                                                                  | 2.0 | 95610_at    | Cdc5l             | 2.2 |
| 94076_i_at  | Rpn2                       | 0.50 | 95135_at    | Mid1ip1                                                                                                                                                                                                                                                                                                                                                                                                                                                                | 2.0 | 94064_at    | Zfp91             | 2.2 |
| 160975_at   | Rsnl2                      | 0.50 | 95784_at    | Pira1                                                                                                                                                                                                                                                                                                                                                                                                                                                                  | 2.0 | 102883_at   | Rpap1             | 2.2 |
| 102384_at   | Smarca2                    | 0.50 | 99592_f_at  | Rdh11                                                                                                                                                                                                                                                                                                                                                                                                                                                                  | 2.0 | 93959_at    | 2010107H<br>07Rik | 2.2 |
| 98463_at    | Smarca4                    | 0.50 | 98600_at    | S100a11                                                                                                                                                                                                                                                                                                                                                                                                                                                                | 2.0 | 102676_at   | Vhlh              | 2.2 |
| 104280_at   | Sncg                       | 0.50 | 102768_i_at | Sc5d                                                                                                                                                                                                                                                                                                                                                                                                                                                                   | 2.0 | 97539_at    | Hrmt1l3           | 2.2 |
| 102378_at   | Sspn                       | 0.50 | 96302_at    | Sfrs7                                                                                                                                                                                                                                                                                                                                                                                                                                                                  | 2.0 | 92429_at    | Mc2r              | 2.2 |
| 100477_at   | Tmem45a                    | 0.50 | 99094_at    | Slc12a1                                                                                                                                                                                                                                                                                                                                                                                                                                                                | 2.0 | 94483_at    | Csnk2a2           | 2.2 |
| 94835_f_at  | Tubb2                      | 0.50 | 98569_at    | Slc25a25                                                                                                                                                                                                                                                                                                                                                                                                                                                               | 2.0 | 160613_at   | Tinagl            | 2.2 |
| 161612_f_at | Tubb3 ///<br>LOC54588<br>7 | 0.50 | 93084_at    | Slc25a4                                                                                                                                                                                                                                                                                                                                                                                                                                                                | 2.0 | 93204_r_at  | Foxn2             | 2.2 |
| 93652_i_at  | Vamp1                      | 0.50 | 95733_at    | Slc29a1                                                                                                                                                                                                                                                                                                                                                                                                                                                                | 2.0 | 97990_at    | Myh11             | 2.2 |
| 92995_at    | Vsnl1                      | 0.50 | 94322_at    | Sqle                                                                                                                                                                                                                                                                                                                                                                                                                                                                   | 2.0 | 92768_s_at  | Alas2             | 2.2 |
| 102091_f_at | 102091_f_at                | 2.0  | 98596_s_at  | St3gal5                                                                                                                                                                                                                                                                                                                                                                                                                                                                | 2.0 | 99809_at    | Pax2              | 2.2 |
| 93592_at    | Apod                       | 2.0  | 93434_at    | Sult5a1                                                                                                                                                                                                                                                                                                                                                                                                                                                                | 2.0 | 96513_at    | Al451896          | 2.3 |
| 98869_g_at  | Bcl2                       | 2.0  | 101548_at   | Synj2bp                                                                                                                                                                                                                                                                                                                                                                                                                                                                | 2.0 | 96132_at    | Apcdd1            | 2.3 |
| 93397_at    | Ccr2                       | 2.0  | 100154_at   | Tapbp                                                                                                                                                                                                                                                                                                                                                                                                                                                                  | 2.0 | 92507_at    | Utrn              | 2.3 |
| 160894_at   | Cebpd                      | 2.0  | 98937_at    | Tbrg1                                                                                                                                                                                                                                                                                                                                                                                                                                                                  | 2.0 | 101180_at   | Atm               | 2.3 |
| 94420_f_at  | Cry1                       | 2.0  | 95383_at    | Tm7sf2                                                                                                                                                                                                                                                                                                                                                                                                                                                                 | 2.0 | 102144_f_at | 102144_f_at       | 2.3 |
| 99979_at    | Cyp1b1                     | 2.0  | 160207_at   | Acly                                                                                                                                                                                                                                                                                                                                                                                                                                                                   | 2.1 | 95393_at    | Btbd3             | 2.3 |
| 160379_at   | Epb4.1                     | 2.0  | 97523_i_at  | Amy2 ///<br>LOC545562                                                                                                                                                                                                                                                                                                                                                                                                                                                  | 2.1 | 102123_at   | Lip1              | 2.3 |
| 98531_g_at  | Gas5                       | 2.0  | 102348_at   | BC003993 ///<br>LOC432468 ///<br>LOC432512 ///<br>LOC432683 ///<br>LOC432823 ///<br>LOC432857 ///<br>LOC432890 ///<br>LOC432924 ///<br>LOC432932 ///<br>LOC433038 ///<br>LOC433041 ///<br>LOC433043 ///<br>LOC433154 ///<br>LOC433373 ///<br>LOC433596 ///<br>LOC433893 ///<br>LOC433915 ///<br>LOC434071 ///<br>LOC434166 ///<br>LOC434286 ///<br>LOC434287 ///<br>LOC434383 ///<br>LOC434421 ///<br>LOC434430 ///<br>LOC434450 ///<br>LOC434503 ///<br>LOC434589 /// | 2.1 | 99663_g_at  | Pcnt1             | 2.3 |

|             |                       |     |             |                                                                                                                                                                                                                                                                                                                                                                                                                                                    |     |            |                   |     |
|-------------|-----------------------|-----|-------------|----------------------------------------------------------------------------------------------------------------------------------------------------------------------------------------------------------------------------------------------------------------------------------------------------------------------------------------------------------------------------------------------------------------------------------------------------|-----|------------|-------------------|-----|
|             |                       |     |             | LOC434600 ///<br>LOC434620 ///<br>LOC434657 ///<br>LOC434801 ///<br>LOC434810 ///<br>LOC434815 ///<br>LOC434829 ///<br>LOC436444 ///<br>LOC544751 ///<br>LOC544841 ///<br>LOC545083 ///<br>LOC545301 ///<br>LOC545308 ///<br>LOC545349 ///<br>LOC545603 ///<br>LOC545657 ///<br>LOC545659 ///<br>LOC545842 ///<br>LOC545895 ///<br>LOC545918 ///<br>LOC545995 ///<br>LOC546031 ///<br>LOC546047 ///<br>LOC546177 ///<br>LOC546345 ///<br>LOC547373 |     |            |                   |     |
| 99810_at    | Gpx2                  | 2.0 | 96020_at    | C1qb                                                                                                                                                                                                                                                                                                                                                                                                                                               | 2.1 | 99994_at   | Cidea             | 2.3 |
| 96092_at    | Hp                    | 2.0 | 98137_at    | Car5a                                                                                                                                                                                                                                                                                                                                                                                                                                              | 2.1 | 103624_at  | 2900073H<br>19Rik | 2.3 |
| 97763_at    | Ncf1                  | 2.0 | 102736_at   | Ccl2                                                                                                                                                                                                                                                                                                                                                                                                                                               | 2.1 | 160754_at  | Pygm              | 2.3 |
| 101938_at   | Pabpc2                | 2.0 | 95661_at    | Cd9                                                                                                                                                                                                                                                                                                                                                                                                                                                | 2.1 | 97352_f_at | Cox6b2            | 2.3 |
| 95784_at    | Pira1                 | 2.0 | 92835_at    | Cml1                                                                                                                                                                                                                                                                                                                                                                                                                                               | 2.1 | 104503_at  | Pkn2              | 2.3 |
| 102838_at   | Sell                  | 2.0 | 161081_at   | Cpeb2                                                                                                                                                                                                                                                                                                                                                                                                                                              | 2.1 | 101159_at  | Mitf              | 2.3 |
| 162392_r_at | Ttc10                 | 2.0 | 160421_r_at | Ctrb1                                                                                                                                                                                                                                                                                                                                                                                                                                              | 2.1 | 92354_at   | Maf               | 2.3 |
| 98761_i_at  | Zfp97 ///<br>BC018101 | 2.0 | 101537_at   | Es1                                                                                                                                                                                                                                                                                                                                                                                                                                                | 2.1 | 93319_at   | Rasa3             | 2.3 |
| 103024_at   | Adam8                 | 2.1 | 162457_f_at | Hba-a1                                                                                                                                                                                                                                                                                                                                                                                                                                             | 2.1 | 93356_at   | Mcm7              | 2.3 |
| 100896_at   | Cacng1                | 2.1 | 101682_f_at | Mup4                                                                                                                                                                                                                                                                                                                                                                                                                                               | 2.1 | 96085_at   | Gsta4             | 2.3 |
| 92849_at    | Ccl6                  | 2.1 | 100307_at   | Nfix                                                                                                                                                                                                                                                                                                                                                                                                                                               | 2.1 | 95360_at   | Zcchc6            | 2.3 |
| 99413_at    | Ccr1                  | 2.1 | 101471_at   | Pklr                                                                                                                                                                                                                                                                                                                                                                                                                                               | 2.1 | 103514_at  | Tnfrsf21          | 2.3 |
| 162371_r_at | Ephb6                 | 2.1 | 103752_r_at | Strn                                                                                                                                                                                                                                                                                                                                                                                                                                               | 2.1 | 99644_at   | Zfp289            | 2.3 |
| 96553_at    | Gpr65                 | 2.1 | 102425_at   | Tle1                                                                                                                                                                                                                                                                                                                                                                                                                                               | 2.1 | 99641_at   | D2Bwg089<br>1e    | 2.4 |
| 160101_at   | Hmox1                 | 2.1 | 95024_at    | Usp18                                                                                                                                                                                                                                                                                                                                                                                                                                              | 2.1 | 160865_at  | Vldlr             | 2.4 |
| 94171_at    | Itgb2l                | 2.1 | 103063_at   | Zfp62                                                                                                                                                                                                                                                                                                                                                                                                                                              | 2.1 | 92664_at   | 2500002G<br>23Rik | 2.4 |
| 98003_at    | Lilrb3                | 2.1 | 92233_at    | 1810007M14Ri<br>k                                                                                                                                                                                                                                                                                                                                                                                                                                  | 2.3 | 103957_at  | Tfrc              | 2.4 |
| 102940_at   | Ltb                   | 2.1 | 102920_at   | 9130422G05Ri<br>k                                                                                                                                                                                                                                                                                                                                                                                                                                  | 2.3 | 160139_at  | Hspb8             | 2.4 |
| 103662_at   | Ncf4                  | 2.1 | 103982_s_at | Adh4                                                                                                                                                                                                                                                                                                                                                                                                                                               | 2.3 | 94125_at   | Eva1              | 2.4 |
| 162468_at   | Rhoc                  | 2.1 | 160495_at   | Ahr                                                                                                                                                                                                                                                                                                                                                                                                                                                | 2.3 | 93463_at   | Usp19             | 2.4 |
| 95731_at    | Sesn1                 | 2.1 | 93858_at    | Cxcl10                                                                                                                                                                                                                                                                                                                                                                                                                                             | 2.3 | 95022_at   | Akap12            | 2.4 |
| 100397_at   | Tyrobp                | 2.1 | 103617_at   | Daf1                                                                                                                                                                                                                                                                                                                                                                                                                                               | 2.3 | 101110_at  | Col6a3            | 2.4 |
| 100920_at   | 100920_at             | 2.3 | 98822_at    | G1p2                                                                                                                                                                                                                                                                                                                                                                                                                                               | 2.3 | 160369_at  | Dhcr24            | 2.4 |
| 161156_r_at | 161156_r_at           | 2.3 | 104588_at   | Hamp1                                                                                                                                                                                                                                                                                                                                                                                                                                              | 2.3 | 104290_at  | Casp8ap2          | 2.4 |
| 94027_at    | 94027_at              | 2.3 | 104285_at   | Hmgcr                                                                                                                                                                                                                                                                                                                                                                                                                                              | 2.3 | 161040_at  | Fzd1              | 2.4 |
| 103365_s_at | Arhgap9               | 2.3 | 98111_at    | Hsp110                                                                                                                                                                                                                                                                                                                                                                                                                                             | 2.3 | 102893_at  | Pou2f1            | 2.4 |
| 162366_r_at | C2                    | 2.3 | 103486_at   | Il1b                                                                                                                                                                                                                                                                                                                                                                                                                                               | 2.3 | 93930_at   | Lasp1             | 2.4 |
| 98098_at    | Car1                  | 2.3 | 94929_at    | Ptpn1                                                                                                                                                                                                                                                                                                                                                                                                                                              | 2.3 | 98346_at   | Lrrc54            | 2.5 |

|             |                                                                                              |     |                 |                                                                                  |     |             |                              |     |
|-------------|----------------------------------------------------------------------------------------------|-----|-----------------|----------------------------------------------------------------------------------|-----|-------------|------------------------------|-----|
| 100914_at   | Drd3                                                                                         | 2.3 | 97844_at        | Rgs2                                                                             | 2.3 | 94893_at    | 2610301B<br>20Rik            | 2.5 |
| 101800_at   | Fpr-rs2                                                                                      | 2.3 | 102712_at       | Saa3                                                                             | 2.3 | 97795_at    | Calcl                        | 2.5 |
| 102763_at   | MGI:19297<br>09                                                                              | 2.3 | 104451_at       | Slc11a2                                                                          | 2.3 | 160678_at   | Tspan12                      | 2.5 |
| 94769_at    | Mmp8                                                                                         | 2.3 | 97722_at        | Ssr1                                                                             | 2.3 | 93527_at    | Klf9                         | 2.5 |
| 93573_at    | Mt1                                                                                          | 2.3 | 103035_at       | Tap1                                                                             | 2.3 | 99390_at    | Wnt5a                        | 2.5 |
| 101561_at   | Mt2                                                                                          | 2.3 | 98761_i_at      | Zfp97 ///<br>BC018101                                                            | 2.3 | 95772_r_at  | Fzd4                         | 2.5 |
| 100328_s_at | Pira1 ///<br>Pira2 ///<br>Pira3 ///<br>Pira4 ///<br>Pira6 ///<br>Lilrb3 ///<br>LOC54602<br>7 | 2.3 | 103748_at       | 4933407C03Rik                                                                    | 2.5 | 92489_at    | Gimap1                       | 2.5 |
| 161257_r_at | Snx17                                                                                        | 2.3 | 100569_at       | Anxa2                                                                            | 2.5 | 95955_at    | Ppp2r5e                      | 2.5 |
| 92559_at    | Vcam1                                                                                        | 2.3 | 95466_at        | Cotl1                                                                            | 2.5 | 96801_at    | Ak1                          | 2.5 |
| 103269_f_at | Zfp125                                                                                       | 2.3 | 102820_at       | Cyp2b13                                                                          | 2.5 | 102800_at   | Foxc2                        | 2.5 |
| 101912_at   | 1100001G<br>20Rik                                                                            | 2.5 | 100069_at       | Cyp2f2                                                                           | 2.5 | 104300_at   | Iqgap1                       | 2.5 |
| 103545_at   | 2610019E<br>17Rik                                                                            | 2.5 | 102651_at       | Gck                                                                              | 2.5 | 96832_at    | Slc39a1                      | 2.5 |
| 104089_at   | 2810026P<br>18Rik                                                                            | 2.5 | 99107_at        | Ghr                                                                              | 2.5 | 161815_f_at | Mup1 ///<br>Mup2 ///<br>Mup3 | 2.5 |
| 95184_f_at  | 95184_f_at                                                                                   | 2.5 | 97541_f_at      | H2-D1                                                                            | 2.5 | 99917_at    | Ezh2                         | 2.5 |
| 104363_at   | Cdsn                                                                                         | 2.5 | 96752_at        | Icam1                                                                            | 2.5 | 101521_at   | Birc5                        | 2.5 |
| 92762_at    | Clec4a2                                                                                      | 2.5 | 97444_at        | Ifi30                                                                            | 2.5 | 97723_at    | Cbx2                         | 2.5 |
| 161779_r_at | Cryl1                                                                                        | 2.5 | 102156_f_<br>at | Igk-C /// Igk-V21<br>/// Igk-V28 ///<br>LOC243469 ///<br>Igk-V8 ///<br>LOC545854 | 2.5 | 93886_at    | Tollip                       | 2.6 |
| 103460_at   | Ddit4                                                                                        | 2.5 | 102401_at       | Irf1                                                                             | 2.5 | 96587_at    | Arf3                         | 2.6 |
| 161357_r_at | Gstm2                                                                                        | 2.5 | 93868_at        | Nsdhl                                                                            | 2.5 | 161760_s_at | Rbbp6                        | 2.6 |
| 92471_i_at  | Sifn2                                                                                        | 2.5 | 104343_f_<br>at | Pla2g12a                                                                         | 2.5 | 93414_at    | Abcb1b                       | 2.6 |
| 160865_at   | Vldlr                                                                                        | 2.5 | 92873_f_at      | Prss2                                                                            | 2.5 | 93033_at    | Ube2e3                       | 2.6 |
| 162265_r_at | Zfp393                                                                                       | 2.5 | 101306_f_<br>at | 101306_f_at                                                                      | 2.6 | 96220_at    | Lig3                         | 2.6 |
| 94689_at    | C79248                                                                                       | 2.6 | 160799_at       | 160799_at                                                                        | 2.6 | 96183_at    | Foxp1                        | 2.6 |
| 162287_r_at | Clca3                                                                                        | 2.6 | 99403_at        | Art2a                                                                            | 2.6 | 102062_at   | Smarcc1                      | 2.6 |
| 104217_at   | Gdpd3                                                                                        | 2.6 | 94939_at        | Cd53                                                                             | 2.6 | 160475_at   | Yipf4                        | 2.6 |
| 93015_at    | Gsta3                                                                                        | 2.6 | 96298_f_at      | Dncl1                                                                            | 2.6 | 97722_at    | Ssr1                         | 2.6 |
| 92740_at    | Igh-6                                                                                        | 2.6 | 98892_at        | Lpin1                                                                            | 2.6 | 93354_at    | Apoc1                        | 2.6 |
| 100521_at   | Ovgp1                                                                                        | 2.6 | 103571_at       | Lst1                                                                             | 2.6 | 97994_at    | Tcf7                         | 2.6 |
| 92356_at    | Ptpn22                                                                                       | 2.6 | 102104_f_<br>at | Ms4a6c                                                                           | 2.6 | 160903_at   | Apbb2                        | 2.6 |
| 93624_at    | Slc10a6                                                                                      | 2.6 | 102371_at       | Nr4a1                                                                            | 2.6 | 101305_at   | Pou3f3                       | 2.6 |
| 95303_at    | 95303_at                                                                                     | 2.8 | 94788_f_at      | Tubb5                                                                            | 2.6 | 92501_s_at  | Plagl1                       | 2.6 |
| 98577_f_at  | 98577_f_at                                                                                   | 2.8 | 103429_i_<br>at | AL024210                                                                         | 2.8 | 98890_at    | 1700012G<br>19Rik            | 2.6 |
| 99387_at    | Fpr1                                                                                         | 2.8 | 93372_at        | Anp32a                                                                           | 2.8 | 100410_at   | C330027G<br>06Rik            | 2.6 |
| 94477_at    | LOC43449<br>8                                                                                | 2.8 | 94030_at        | Commd2                                                                           | 2.8 | 160083_at   | Lpl                          | 2.6 |
| 100348_at   | X83313                                                                                       | 2.8 | 93294_at        | Ctgf                                                                             | 2.8 | 103054_at   | Polr2a                       | 2.6 |
| 95936_at    | 95936_at                                                                                     | 3.0 | 93990_at        | Hnrph1                                                                           | 2.8 | 103064_at   | Chek1                        | 2.7 |
| 94881_at    | Cdkn1a                                                                                       | 3.0 | 93871_at        | Ilf1rn                                                                           | 2.8 | 160834_at   | Sertad1                      | 2.7 |
| 95951_at    | Clec4d                                                                                       | 3.0 | 96066_s_a<br>t  | Pkm2                                                                             | 2.8 | 102354_at   | Tcf19                        | 2.7 |
| 99842_at    | Col19a1                                                                                      | 3.0 | 103070_at       | Ptpns1                                                                           | 2.8 | 160603_at   | Pparbp                       | 2.7 |



|             |                                                                                                                                                                                                                                                                                                                                                                                                                                                              |     |             |                                                 |     |             |                   |     |
|-------------|--------------------------------------------------------------------------------------------------------------------------------------------------------------------------------------------------------------------------------------------------------------------------------------------------------------------------------------------------------------------------------------------------------------------------------------------------------------|-----|-------------|-------------------------------------------------|-----|-------------|-------------------|-----|
| 95082_at    | Igfbp3                                                                                                                                                                                                                                                                                                                                                                                                                                                       | 3.0 | 92539_at    | S100a10                                         | 2.8 | 96081_at    | Tk1               | 2.7 |
| 102955_at   | Nfil3                                                                                                                                                                                                                                                                                                                                                                                                                                                        | 3.2 | 95937_at    | O610040J01Rik                                   | 3.0 | 160173_at   | Gtl2              | 2.7 |
| 101732_at   | Phxr5                                                                                                                                                                                                                                                                                                                                                                                                                                                        | 3.2 | 103562_f_at | 1300007C21Rik<br>/// LOC433762<br>/// LOC546083 | 3.0 | 94231_at    | Ccnd1             | 2.7 |
| 93933_at    | Ppp1r3c                                                                                                                                                                                                                                                                                                                                                                                                                                                      | 3.2 | 98942_r_at  | 2310032D16Rik                                   | 3.0 | 160066_at   | Limd1             | 2.7 |
| 100687_f_at | V2r14                                                                                                                                                                                                                                                                                                                                                                                                                                                        | 3.2 | 96513_at    | Al451896                                        | 3.0 | 101985_at   | Plg               | 2.7 |
| 95740_at    | 95740_at                                                                                                                                                                                                                                                                                                                                                                                                                                                     | 3.5 | 93397_at    | Ccr2                                            | 3.0 | 100479_at   | Dnmt3a            | 2.7 |
| 104588_at   | Hamp1                                                                                                                                                                                                                                                                                                                                                                                                                                                        | 3.5 | 101936_at   | Clk4                                            | 3.0 | 97421_at    | Smc2l1            | 2.7 |
| 102658_at   | Il1r2                                                                                                                                                                                                                                                                                                                                                                                                                                                        | 3.5 | 95552_at    | Dio1                                            | 3.0 | 93155_at    | A930004K<br>21Rik | 2.7 |
| 92694_at    | Chi3l3                                                                                                                                                                                                                                                                                                                                                                                                                                                       | 3.7 | 160424_f_at | Fdps ///<br>LOC544723                           | 3.0 | 104188_at   | Notch2            | 2.7 |
| 102818_at   | Xmr ///<br>LOC38227<br>3 ///<br>LOC43473<br>6 ///<br>LOC43473<br>9 ///<br>LOC43474<br>2 ///<br>LOC43475<br>3 ///<br>LOC54470<br>0 ///<br>LOC54619<br>4 ///<br>LOC54627<br>2 ///<br>LOC54627<br>3 ///<br>LOC54627<br>4 ///<br>LOC54627<br>5 ///<br>LOC54627<br>6 ///<br>LOC54627<br>8 ///<br>LOC54628<br>1 ///<br>MGC1182<br>08 ///<br>LOC54628<br>3 ///<br>LOC54628<br>5 ///<br>LOC54628<br>6 ///<br>LOC54628<br>9 ///<br>LOC54629<br>1 ///<br>LOC54629<br>2 | 3.7 | 93015_at    | Gsta3                                           | 3.0 | 93220_at    | Col4a5            | 2.7 |
| 92202_g_at  | Zbtb16                                                                                                                                                                                                                                                                                                                                                                                                                                                       | 3.7 | 97258_at    | Lactb2                                          | 3.0 | 93402_i_at  | Birc4             | 2.7 |
| 160906_i_at | 160906_i_at                                                                                                                                                                                                                                                                                                                                                                                                                                                  | 4.6 | 93308_s_at  | Pcx                                             | 3.0 | 94853_at    | Gnb1              | 2.7 |
| 97402_at    | Inmt                                                                                                                                                                                                                                                                                                                                                                                                                                                         | 4.9 | 93718_at    | Rab23                                           | 3.0 | 100701_r_at | Nr5a1             | 2.7 |
| 94297_at    | Fkbp5                                                                                                                                                                                                                                                                                                                                                                                                                                                        | 5.3 | 94056_at    | Scd1                                            | 3.0 | 92956_at    | Notch3            | 2.8 |
|             |                                                                                                                                                                                                                                                                                                                                                                                                                                                              |     | 98562_at    | C1qa                                            | 3.2 | 104072_at   | Apcs              | 2.8 |
|             |                                                                                                                                                                                                                                                                                                                                                                                                                                                              |     | 95654_at    | Clic1                                           | 3.2 | 93228_at    | Hells             | 2.8 |
|             |                                                                                                                                                                                                                                                                                                                                                                                                                                                              |     | 97297_at    | Pcp4l1                                          | 3.2 | 103414_at   | Skiv2l            | 2.8 |
|             |                                                                                                                                                                                                                                                                                                                                                                                                                                                              |     | 96093_at    | O610007P14Rik                                   | 3.5 | 103634_at   | Isgf3g            | 2.8 |
|             |                                                                                                                                                                                                                                                                                                                                                                                                                                                              |     | 95655_at    | 5830411E10Rik                                   | 3.5 | 103582_r_at | Ube2w             | 2.8 |

|  |  |             |                             |     |             |               |     |
|--|--|-------------|-----------------------------|-----|-------------|---------------|-----|
|  |  | 99608_at    | Prdx2                       | 3.5 | 100320_at   | Kpna4         | 2.8 |
|  |  | 92736_at    | Slc7a2                      | 3.5 | 160659_at   | Hdcc2         | 2.8 |
|  |  | 96426_at    | Tmsb4x                      | 3.5 | 100593_at   | Tnnt2         | 2.8 |
|  |  | 162402_r_at | Hoxa4                       | 3.7 | 103006_at   | Atf5          | 2.8 |
|  |  | 96672_at    | MGI:1916782                 | 3.7 | 93041_at    | Mcm4          | 2.8 |
|  |  | 94076_i_at  | Rpn2                        | 3.7 | 101178_at   | Sema3c        | 2.9 |
|  |  | 102035_at   | Tpmt                        | 3.7 | 160553_at   | Ly6d          | 2.9 |
|  |  | 103619_at   | 1810044O22Rik               | 4.0 | 93855_at    | Rem1          | 2.9 |
|  |  | 160546_at   | Aldoc                       | 4.0 | 103766_at   | Sema5a        | 2.9 |
|  |  | 103641_at   | BC030183                    | 4.0 | 103022_at   | Map3k1        | 3.0 |
|  |  | 103708_at   | Eif1a                       | 4.0 | 94415_at    | 6230421P05Rik | 3.0 |
|  |  | 95974_at    | Gbp1                        | 4.0 | 93912_at    | Bat3          | 3.0 |
|  |  | 93092_at    | H2-DMa                      | 4.0 | 94305_at    | Col1a1        | 3.0 |
|  |  | 103006_at   | Atf5                        | 4.3 | 104402_at   | Gtf3c4        | 3.0 |
|  |  | 103703_f_at | C730048C13Rik /// LOC434674 | 4.3 | 99367_at    | Mapre1        | 3.0 |
|  |  | 101872_at   | Gsta2                       | 4.3 | 92516_at    | Ndst1         | 3.1 |
|  |  | 161870_at   | Usp15                       | 4.3 | 97541_f_at  | H2-D1         | 3.1 |
|  |  | 93274_at    | Clk1                        | 4.6 | 98989_at    | Dhcr7         | 3.2 |
|  |  | 98989_at    | Dhcr7                       | 4.6 | 94802_at    | BC060632      | 3.2 |
|  |  | 98410_at    | ligp2                       | 4.6 | 93872_at    | Gfra1         | 3.2 |
|  |  | 101173_at   | Pctp                        | 4.6 | 160862_at   | Ptp4a3        | 3.2 |
|  |  | 103529_at   | Tnfaip8l1                   | 4.6 | 95021_at    | 9430010003Rik | 3.2 |
|  |  | 95555_at    | Unc119                      | 4.6 | 97506_at    | Rnf2          | 3.2 |
|  |  | 104165_at   | Vnn1                        | 4.6 | 100074_at   | Tmed9         | 3.2 |
|  |  | 97908_at    | 1110007A06Rik               | 4.9 | 93824_at    | Cps1          | 3.2 |
|  |  | 104444_at   | 9430098E02Rik               | 4.9 | 103806_at   | Lrp5          | 3.2 |
|  |  | 96026_at    | Ahcy                        | 4.9 | 100095_at   | Scarb1        | 3.2 |
|  |  | 92814_at    | Cyp2j5                      | 4.9 | 95007_at    | Tpr           | 3.2 |
|  |  | 160632_at   | Prkcn                       | 4.9 | 97998_at    | Atn1          | 3.2 |
|  |  | 93389_at    | Prom1                       | 4.9 | 99637_at    | Col15a1       | 3.3 |
|  |  | 97165_r_at  | Adnp                        | 5.3 | 103506_f_at | Dsc2          | 3.3 |
|  |  | 93085_at    | Psmb9                       | 5.3 | 93721_at    | Cap1          | 3.3 |
|  |  | 92282_at    | 2610304G08Rik               | 5.7 | 100925_at   | 100925_at     | 3.3 |
|  |  | 94774_at    | Ifi202b                     | 5.7 | 160667_at   | Evl           | 3.3 |
|  |  | 93772_i_at  | Zfp265                      | 5.7 | 102259_at   | Ywhag         | 3.3 |
|  |  | 96605_at    | 0610011104Rik               | 6.1 | 104168_at   | Actr2         | 3.4 |
|  |  | 103401_at   | Acads                       | 6.1 | 160986_r_at | Ace2          | 3.4 |
|  |  | 102904_at   | H2-Ea                       | 6.1 | 94797_at    | Slc26a1       | 3.4 |
|  |  | 98092_at    | Plac8                       | 6.1 | 162459_f_at | Col6a1        | 3.4 |
|  |  | 98084_at    | Arl2bp                      | 6.5 | 96895_at    | Pon1          | 3.4 |
|  |  | 96955_at    | Atp6v0e2                    | 6.5 | 95177_at    | AA414993      | 3.5 |
|  |  | 103072_at   | Hsd3b1                      | 6.5 | 98960_s_at  | B3galt3       | 3.6 |
|  |  | 95611_at    | Lpl                         | 7.0 | 92556_at    | Akr1c6        | 3.7 |
|  |  | 97160_at    | Sparc                       | 7.0 | 96047_at    | Rbp4          | 3.7 |
|  |  | 162034_r_at | Antxr2                      | 7.5 | 100690_at   | Th            | 3.7 |
|  |  | 94881_at    | Cdkn1a                      | 7.5 | 93846_at    | Snn           | 3.8 |
|  |  | 93276_at    | Hn1                         | 7.5 | 104158_at   | Snw1          | 3.8 |
|  |  | 103710_at   | MGC107415                   | 7.5 | 160306_at   | Thrsp         | 3.8 |
|  |  | 94734_at    | Orm2                        | 7.5 | 161770_f_at | D1Ert161e     | 3.8 |
|  |  | 93005_at    | Syt1                        | 8.0 | 103665_at   | Elovl6        | 3.9 |

|  |  |  |            |               |       |             |                                                 |     |
|--|--|--|------------|---------------|-------|-------------|-------------------------------------------------|-----|
|  |  |  | 104032_at  | 104032_at     | 8.6   | 95920_at    | BC016495                                        | 3.9 |
|  |  |  | 92841_f_at | Chgb          | 9.2   | 102848_f_at | 2610524H06Rik                                   | 3.9 |
|  |  |  | 102698_at  | Epas1         | 9.8   | 92280_at    | Actn1                                           | 3.9 |
|  |  |  | 103791_at  | Narg1         | 9.8   | 95727_at    | Apoa5                                           | 4.0 |
|  |  |  | 96651_at   | Smarce1       | 9.8   | 97468_at    | Cks1b                                           | 4.1 |
|  |  |  | 98606_s_at | Wars          | 9.8   | 160522_at   | D0H4S114                                        | 4.1 |
|  |  |  | 160737_at  | Lss           | 10.6  | 97772_at    | Plau                                            | 4.1 |
|  |  |  | 160213_at  | Reg1          | 10.6  | 104239_at   | Tspan32                                         | 4.2 |
|  |  |  | 93721_at   | Cap1          | 12.1  | 103235_at   | Npy                                             | 4.3 |
|  |  |  | 96124_at   | 2310001H13Rik | 13.9  | 92659_at    | Rapgef4                                         | 4.3 |
|  |  |  | 103520_at  | Vegfa         | 14.9  | 96038_at    | Rnase4                                          | 4.4 |
|  |  |  | 101840_at  | Egfr          | 16.0  | 160829_at   | Phlda1                                          | 4.4 |
|  |  |  | 103080_at  | Samhd1        | 17.1  | 160934_s_at | 160934_s_at                                     | 4.5 |
|  |  |  | 100120_at  | Nid1          | 19.7  | 93670_at    | Erf                                             | 4.5 |
|  |  |  | 97890_at   | Sgk           | 21.1  | 92207_at    | Eln                                             | 4.6 |
|  |  |  | 92833_at   | Hal           | 22.6  | 93631_at    | Arhgef2                                         | 4.6 |
|  |  |  | 96713_at   | Papss2        | 24.3  | 100062_at   | Mcm3                                            | 4.7 |
|  |  |  | 101973_at  | Cited2        | 26.0  | 95888_at    | Aff4                                            | 4.8 |
|  |  |  | 98480_s_at | Ren1 /// Ren2 | 27.9  | 98731_at    | Rab5b                                           | 4.9 |
|  |  |  | 104225_at  | Snx5          | 32.0  | 103519_at   | Ces1                                            | 4.9 |
|  |  |  | 92198_s_at | Daf2          | 34.3  | 98824_at    | Irs1                                            | 5.0 |
|  |  |  | 102860_at  | Serpina3g     | 34.3  | 99507_at    | Ucp1                                            | 5.1 |
|  |  |  | 160316_at  | 2310005N03Rik | 39.4  | 93225_s_at  | Cyp21a1                                         | 5.2 |
|  |  |  | 102353_at  | Itgb2         | 39.4  | 102826_at   | Akr1b7                                          | 5.2 |
|  |  |  | 160735_at  | Lin10         | 55.7  | 99515_at    | 99515_at                                        | 5.3 |
|  |  |  | 95749_at   | Armet         | 111.4 | 93926_at    | Prlr                                            | 5.3 |
|  |  |  | 101979_at  | Gadd45g       | 362.0 | 103522_at   | Sgcd                                            | 5.5 |
|  |  |  |            |               |       | 100462_at   | Arf6                                            | 5.6 |
|  |  |  |            |               |       | 99897_at    | Gabrb3                                          | 5.6 |
|  |  |  |            |               |       | 104484_at   | Sult2a2                                         | 5.9 |
|  |  |  |            |               |       | 103952_at   | Hoxb9                                           | 6.0 |
|  |  |  |            |               |       | 95561_at    | Syce2                                           | 6.1 |
|  |  |  |            |               |       | 104066_at   | AW548124                                        | 6.1 |
|  |  |  |            |               |       | 161574_r_at | Atp2c1                                          | 6.5 |
|  |  |  |            |               |       | 95879_at    | Asf1a                                           | 6.6 |
|  |  |  |            |               |       | 103369_at   | 9430029L20Rik                                   | 6.7 |
|  |  |  |            |               |       | 98925_at    | Vamp2                                           | 6.7 |
|  |  |  |            |               |       | 97796_at    | Crsp2                                           | 6.8 |
|  |  |  |            |               |       | 103577_at   | Pfkfb3                                          | 6.9 |
|  |  |  |            |               |       | 104672_at   | Frzb                                            | 7.2 |
|  |  |  |            |               |       | 99564_at    | Uhrf1                                           | 7.2 |
|  |  |  |            |               |       | 100156_at   | Mcm5                                            | 7.4 |
|  |  |  |            |               |       | 98390_at    | Impdh1                                          | 7.5 |
|  |  |  |            |               |       | 100060_i_at | Klk6 /// Klk5                                   | 7.8 |
|  |  |  |            |               |       | 94356_at    | Trp53bp1                                        | 8.3 |
|  |  |  |            |               |       | 161869_i_at | Hspca /// LOC433221 /// LOC544800 /// LOC545508 | 8.6 |
|  |  |  |            |               |       | 104591_g_at | Mef2c                                           | 8.7 |
|  |  |  |            |               |       | 161748_r_at | 161748_r_                                       | 9.2 |

|  |  |  |  |  |  |             |                           |       |
|--|--|--|--|--|--|-------------|---------------------------|-------|
|  |  |  |  |  |  |             | at                        |       |
|  |  |  |  |  |  | 98063_at    | Glycam1                   | 9.8   |
|  |  |  |  |  |  | 96532_at    | Ddx50                     | 9.8   |
|  |  |  |  |  |  | 94777_at    | Alb1                      | 9.9   |
|  |  |  |  |  |  | 92740_at    | Igh-6                     | 10.7  |
|  |  |  |  |  |  | 161326_f_at | Serpina6                  | 10.7  |
|  |  |  |  |  |  | 99457_at    | Mki67                     | 11.0  |
|  |  |  |  |  |  | 103434_at   | Pscd3                     | 11.2  |
|  |  |  |  |  |  | 94075_at    | Fabp1                     | 12.7  |
|  |  |  |  |  |  | 92981_at    | Scg2                      | 12.8  |
|  |  |  |  |  |  | 92901_at    | Rara                      | 12.9  |
|  |  |  |  |  |  | 94045_at    | Ambp                      | 13.0  |
|  |  |  |  |  |  | 160919_r_at | Fgfr3                     | 13.3  |
|  |  |  |  |  |  | 98116_at    | Hpxn                      | 13.3  |
|  |  |  |  |  |  | 103072_at   | Hsd3b1                    | 14.2  |
|  |  |  |  |  |  | 101028_i_at | Actc1                     | 17.2  |
|  |  |  |  |  |  | 93514_at    | Myl3                      | 17.3  |
|  |  |  |  |  |  | 104024_at   | Cyp3a25                   | 18.4  |
|  |  |  |  |  |  | 96094_at    | Apoa1                     | 19.1  |
|  |  |  |  |  |  | 102020_at   | Kcnk3                     | 19.1  |
|  |  |  |  |  |  | 98549_at    | Vtn                       | 21.5  |
|  |  |  |  |  |  | 99862_at    | Ahsg                      | 21.6  |
|  |  |  |  |  |  | 93050_at    | Myl2                      | 21.9  |
|  |  |  |  |  |  | 102904_at   | H2-Ea                     | 23.3  |
|  |  |  |  |  |  | 102280_at   | Pcdh7                     | 24.2  |
|  |  |  |  |  |  | 96228_at    | Cyp11a1                   | 28.3  |
|  |  |  |  |  |  | 101899_at   | F2                        | 30.2  |
|  |  |  |  |  |  | 93770_at    | Cyp3a11                   | 35.1  |
|  |  |  |  |  |  | 92737_at    | Irf4                      | 36.0  |
|  |  |  |  |  |  | 101071_at   | Myh6                      | 45.8  |
|  |  |  |  |  |  | 101638_s_at | Cyp3a11<br>///<br>Cyp3a16 | 49.5  |
|  |  |  |  |  |  | 92841_f_at  | Chgb                      | 61.8  |
|  |  |  |  |  |  | 92213_at    | Star                      | 139.4 |
